# Supplementary material for: Association between gene methylation and HBV infection in hepatocellular carcinoma: A meta-analysis
Source: PubMed Central journal article supplement (PMC6856736; doi:10.7150/jca.33005), 2019-10-20

## Supplementary Materials

### Supplementary Document 1: PRISMA checklist.

| Section/topic             | #  | Checklist item                                                                                                                                                                                                                                                                                              | Reported on page # |
|---------------------------|----|-------------------------------------------------------------------------------------------------------------------------------------------------------------------------------------------------------------------------------------------------------------------------------------------------------------|--------------------|
| <b>TITLE</b>              |    |                                                                                                                                                                                                                                                                                                             |                    |
| Title                     | 1  | Identify the report as a systematic review, meta-analysis, or both.                                                                                                                                                                                                                                         | 1                  |
| <b>ABSTRACT</b>           |    |                                                                                                                                                                                                                                                                                                             |                    |
| Structured summary        | 2  | Provide a structured summary including, as applicable: background; objectives; data sources; study eligibility criteria, participants, and interventions; study appraisal and synthesis methods; results; limitations; conclusions and implications of key findings; systematic review registration number. | 2                  |
| <b>INTRODUCTION</b>       |    |                                                                                                                                                                                                                                                                                                             |                    |
| Rationale                 | 3  | Describe the rationale for the review in the context of what is already known.                                                                                                                                                                                                                              | 3                  |
| Objectives                | 4  | Provide an explicit statement of questions being addressed with reference to participants, interventions, comparisons, outcomes, and study design (PICOS).                                                                                                                                                  | 3                  |
| <b>METHODS</b>            |    |                                                                                                                                                                                                                                                                                                             |                    |
| Protocol and registration | 5  | Indicate if a review protocol exists, if and where it can be accessed (e.g., Web address), and, if available, provide registration information including registration number.                                                                                                                               | 4                  |
| Eligibility criteria      | 6  | Specify study characteristics (e.g., PICOS, length of follow-up) and report characteristics (e.g., years considered, language, publication status) used as criteria for eligibility, giving rationale.                                                                                                      | 4                  |
| Information sources       | 7  | Describe all information sources (e.g., databases with dates of coverage, contact with study authors to identify additional studies) in the search and date last searched.                                                                                                                                  | 4                  |
| Search                    | 8  | Present full electronic search strategy for at least one database, including any limits used, such that it could be repeated.                                                                                                                                                                               | 4                  |
| Study selection           | 9  | State the process for selecting studies (i.e., screening, eligibility, included in systematic review, and, if applicable, included in the meta-analysis).                                                                                                                                                   | 4                  |
| Data collection           | 10 | Describe method of data extraction from reports (e.g., piloted                                                                                                                                                                                                                                              | 4                  |

|                                    |          |                                                                                                                                                                                                                        |                           |
|------------------------------------|----------|------------------------------------------------------------------------------------------------------------------------------------------------------------------------------------------------------------------------|---------------------------|
| process                            |          | forms, independently, in duplicate) and any processes for obtaining and confirming data from investigators.                                                                                                            |                           |
| Data items                         | 11       | List and define all variables for which data were sought (e.g., PICOS, funding sources) and any assumptions and simplifications made.                                                                                  | 4                         |
| Risk of bias in individual studies | 12       | Describe methods used for assessing risk of bias of individual studies (including specification of whether this was done at the study or outcome level), and how this information is to be used in any data synthesis. | 5                         |
| Summary measures                   | 13       | State the principal summary measures (e.g., risk ratio, difference in means).                                                                                                                                          | 5                         |
| Synthesis of results               | 14       | Describe the methods of handling data and combining results of studies, if done, including measures of consistency (e.g., $I^2$ ) for each meta-analysis.                                                              | 5                         |
| <b>Section/topic</b>               | <b>#</b> | <b>Checklist item</b>                                                                                                                                                                                                  | <b>Reported on page #</b> |
| Risk of bias across studies        | 15       | Specify any assessment of risk of bias that may affect the cumulative evidence (e.g., publication bias, selective reporting within studies).                                                                           | 5                         |
| Additional analyses                | 16       | Describe methods of additional analyses (e.g., sensitivity or subgroup analyses, meta-regression), if done, indicating which were pre-specified.                                                                       | 8-9                       |
| <b>RESULTS</b>                     |          |                                                                                                                                                                                                                        |                           |
| Study selection                    | 17       | Give numbers of studies screened, assessed for eligibility, and included in the review, with reasons for exclusions at each stage, ideally with a flow diagram.                                                        | 6                         |
| Study characteristics              | 18       | For each study, present characteristics for which data were extracted (e.g., study size, PICOS, follow-up period) and provide the citations.                                                                           | 4                         |
| Risk of bias within studies        | 19       | Present data on risk of bias of each study and, if available, any outcome level assessment (see item 12).                                                                                                              | 6-7, Table 1-3, Figure 2  |
| Results of individual studies      | 20       | For all outcomes considered (benefits or harms), present, for each study: (a) simple summary data for each intervention group (b) effect estimates and confidence intervals, ideally with a forest plot.               | 7-8, Table 1-3            |
| Synthesis of results               | 21       | Present results of each meta-analysis done, including confidence intervals and measures of consistency.                                                                                                                | 7-8, Table 1-3            |
| Risk of bias across studies        | 22       | Present results of any assessment of risk of bias across studies (see Item 15).                                                                                                                                        | 6-7, Table 1-3, Figure    |

|                     |    |                                                                                                                                                                                      |       |
|---------------------|----|--------------------------------------------------------------------------------------------------------------------------------------------------------------------------------------|-------|
|                     |    |                                                                                                                                                                                      | 2     |
| Additional analysis | 23 | Give results of additional analyses, if done (e.g., sensitivity or subgroup analyses, meta-regression [see Item 16]).                                                                | 8-9   |
| <b>DISCUSSION</b>   |    |                                                                                                                                                                                      |       |
| Summary of evidence | 24 | Summarize the main findings including the strength of evidence for each main outcome; consider their relevance to key groups (e.g., healthcare providers, users, and policy makers). | 10-11 |
| Limitations         | 25 | Discuss limitations at study and outcome level (e.g., risk of bias), and at review-level (e.g., incomplete retrieval of identified research, reporting bias).                        | 11    |
| Conclusions         | 26 | Provide a general interpretation of the results in the context of other evidence, and implications for future research.                                                              | 11-12 |
| <b>FUNDING</b>      |    |                                                                                                                                                                                      |       |
| Funding             | 27 | Describe sources of funding for the systematic review and other support (e.g., supply of data); role of funders for the systematic review.                                           | 13    |

*From:* Moher D, Liberati A, Tetzlaff J, Altman DG, The PRISMA Group (2009). Preferred Reporting Items for Systematic Reviews and Meta-Analyses: The PRISMA Statement. PLoS Med 6(7): e1000097. doi:10.1371/journal.pmed1000097

For more information, visit: [www.prisma-statement.org](http://www.prisma-statement.org).

## Supplementary Document 2: 69 eligible studies in this meta-analysis.

### References

1. Wong IH, Lo YM, Zhang J, Liew CT, Ng MH, Wong N, Lai PB, Lau WY, Hjelm NM, Johnson PJ: Detection of aberrant p16 methylation in the plasma and serum of liver cancer patients. *Cancer Res* 1999, 59(1):71-3.
2. Wong IH, Lo YM, Yeo W, Lau WY, Johnson PJ: Frequent p15 promoter methylation in tumor and peripheral blood from hepatocellular carcinoma patients. *Clin Cancer Res* 2000, 6(9):3516-21.
3. Yang B, Guo M, Herman JG, Clark DP: Aberrant promoter methylation profiles of tumor suppressor genes in hepatocellular carcinoma. *Am J Pathol* 2003, 163(3):1101-7.
4. Qin Y, Liu JY, Li B, Sun ZL, Sun ZF: Association of low p16INK4a and p15INK4b mRNAs expression with their CpG islands methylation with human hepatocellular carcinogenesis. *World J Gastroenterol* 2004, 10(9):1276-80.
5. Li X, Hui AM, Sun L, Hasegawa K, Torzilli G, Minagawa M, Takayama T, Makuuchi M: p16INK4A hypermethylation is associated with hepatitis virus infection, age, and gender in hepatocellular carcinoma. *Clin Cancer Res* 2004, 10(22):7484-9.
6. Yang B, Gao YT, Du Z, Zhao L, Song WQ: Methylation-based molecular margin analysis in hepatocellular carcinoma. *Biochem Biophys Res Commun* 2005, 338(3):1353-8.
7. Fukai K, Yokosuka O, Imazeki F, Tada M, Mikata R, Miyazaki M, Ochiai T, Saisho H: Methylation status of p14ARF, p15INK4b, and p16INK4a genes in human hepatocellular carcinoma. *Liver Int* 2005, 25(6):1209-16.
8. Katoh H, Shibata T, Kokubu A, Ojima H, Fukayama M, Kanai Y, Hirohashi S: Epigenetic instability and chromosomal instability in hepatocellular carcinoma. *Am J Pathol* 2006, 168(4):1375-84.
9. Jicai Z, Zongtao Y, Jun L, Haiping L, Jianmin W, Lihua H: Persistent infection of hepatitis B virus is involved in high rate of p16 methylation in hepatocellular carcinoma. *Mol Carcinog* 2006, 45(7):530-6.
10. Su PF, Lee TC, Lin PJ, Lee PH, Jeng YM, Chen CH, Liang JD, Chiou LL, Huang GT, Lee HS: Differential DNA methylation associated with hepatitis B virus infection in hepatocellular carcinoma. *Int J Cancer* 2007, 121(6):1257-64.
11. Nomoto S, Kinoshita T, Kato K, Otani S, Kasuya H, Takeda S, Kanazumi N, Sugimoto H, Nakao A: Hypermethylation of multiple genes as clonal markers in multicentric hepatocellular carcinoma. *Br J Cancer* 2007, 97(9):1260-5.
12. Nishida N, Nagasaka T, Nishimura T, Ikai I, Boland CR, Goel A: Aberrant methylation of multiple tumor suppressor genes in aging liver, chronic hepatitis, and hepatocellular carcinoma. *Hepatology* 2008, 47(3):908-18.
13. Su H, Zhao J, Xiong Y, Xu T, Zhou F, Yuan Y, Zhang Y, Zhuang SM: Large-scale analysis of the genetic and epigenetic alterations in hepatocellular carcinoma from Southeast China. *Mutat Res* 2008, 641(1-2):27-35.
14. Kurita S, Ohkoshi S, Yano M, Yamazaki K, Suzuki K, Aoki YH, Matsuda Y, Wakai T, Shirai Y, Ichida T, Aoyagi Y: Progression of hypermethylation of the p16(INK4A) gene from normal liver to nontumorous liver and hepatocellular carcinoma: an evaluation using quantitative PCR analysis. *Dig Dis Sci* 2009, 54(1):80-8.

15. Feng Q, Stern JE, Hawes SE, Lu H, Jiang M, Kiviat NB: DNA methylation changes in normal liver tissues and hepatocellular carcinoma with different viral infection. *Exp Mol Pathol* 2010, 88(2):287-92.
16. Zhu YZ, Zhu R, Shi LG, Mao Y, Zheng GJ, Chen Q, Zhu HG: Hepatitis B virus X protein promotes hypermethylation of p16(INK4A) promoter through upregulation of DNA methyltransferases in hepatocarcinogenesis. *Exp Mol Pathol* 2010, 89(3):268-75.
17. Qu Z, Jiang Y, Li H, Yu DC, Ding YT: Detecting abnormal methylation of tumor suppressor genes GSTP1, P16, RIZ1, and RASSF1A in hepatocellular carcinoma and its clinical significance. *Oncol Lett* 2015, 10(4):2553-2558.
18. Lou C: The experimental research on DNA methylation profile in hepatocellular carcinoma. Tianjin Med Univ 2008.
19. Zhu YZ: Research on Hepatitis B Virus X Protein promoting hypermethylation of p16INK4A promoter. Fudan Univ 2010.
20. Wang FF: Correlation of aberrant methylation of p16, APC gene to MTHFR, TS genetic polymorphisms in hepatic carcinoma. Qingdao Univ 2011.
21. Qi YP, Wang FF, Cui LH, Song Y: Detection of methylation of p16 and APC gene in liver-cancer tissue and plasma and its clinical significance. *Med J Qilu* 2013, 28(3):189-91.
22. Li H: Study of aberrant methylation and clinical significance of suppressor gene in hepatocellular carcinoma. Soochow Univ 2013.
23. Zhang JC, Yu ZT, Lv J, Xie F, Gao B, Li HP: The relationship between Hepatitis B Virus infection and Multigene methylation in hepatocellular carcinoma. *J Clin Intern Med* 2013, 30(3):163-5.
24. Dong XG, Guo WJ, Ding W: Detection of methylation of p16 and RASSF1A gene in plasma and tumor tissues from patients with hepatocellular carcinoma and its clinical significance. *Chin Med Biotechnol* 2016, 11(3):252-258.
25. Moribe T, Iizuka N, Miura T, Kimura N, Tamatsukuri S, Ishitsuka H, Hamamoto Y, Sakamoto K, Tamesa T, Oka M: Methylation of multiple genes as molecular markers for diagnosis of a small, well-differentiated hepatocellular carcinoma. *Int J Cancer* 2009, 125(2):388-97.
26. Saelee P, Wongkham S, Chariyalertsak S, Petmitr S, Chuensumran U: RASSF1A promoter hypermethylation as a prognostic marker for hepatocellular carcinoma. *Asian Pac J Cancer Prev* 2010, 11(6):1677-81.
27. Feng Y, Xue WJ, Li P, Sha ZY, Huang H, Rui L, Li HX, Mao QS: RASSF1A hypermethylation is associated with aflatoxin B1 and polycyclic aromatic hydrocarbon exposure in hepatocellular carcinoma. *Hepatogastroenterology* 2012, 59(118):1883-8.
28. Zhang X, Li HM, Liu Z, Zhou G, Zhang Q, Zhang T, Zhang J, Zhang C: Loss of heterozygosity and methylation of multiple tumor suppressor genes on chromosome 3 in hepatocellular carcinoma. *J Gastroenterol* 2013, 48(1):132-43.
29. Feng Y, Li P, Liu Y, Sha Z, Feng L, Wang F, Mao Q, Xue W: The Association of Ala133Ser Polymorphism and Methylation in Ras Association Domain Family 1A Gene With Unfavorable Prognosis of Hepatocellular Carcinoma. *Hepat Mon* 2015, 15(10):e32145.
30. Araújo OC, Rosa AS, Fernandes A, Niel C, Villela-Nogueira CA, Pannain V, Araujo NM: RASSF1A and DOK1 Promoter Methylation Levels in Hepatocellular Carcinoma, Cirrhotic and Non-Cirrhotic Liver, and Correlation with Liver Cancer in Brazilian Patients. *PLoS One* 2016, 11(4): e0153796.

31. Zhou XJ, Qin L, Xue WJ, Liu JX, Tian LP, Qian HX: Inactivation of RASSF1A gene in hepatocellular carcinoma. *Chin J Hepatobiliary Surg* 2007, 13(5):351-2.
32. Zhang HJ: Prognostic significance of RASSF1A, APC, WIF-1 methylation in paraffin embedded tissues of HCC. Hebei Univ 2011.
33. Xue WJ, Feng Y, Li P, Mao QS, Guan HG, Qian HX: Correlation analysis of ras association domain family 1A gene methylation and environmental factors to hepatocellular carcinoma. *Chin J Exp Surg* 2012, 29(4):650-2.
34. Fan HY, Zhang HJ, Guo ZJ, Li SM: Prognostic significance of RASSF1 A and WIF-1 methylation in the cancer tissues of patients with HCC. *J Shandong Univ* 2013, 51(5):89-93.
35. Chen TG, Li JG, Lin ZC: Promoter methylation of RASSF1A gene in hepatocellular carcinoma and its clinical significance. *Chin J Gen Surg* 2013, 28(4):300-3.
36. Tada M, Yokosuka O, Fukai K, Chiba T, Imazeki F, Tokuhisa T, Saisho H: Hypermethylation of NAD(P)H: quinone oxidoreductase 1 (NQO1) gene in human hepatocellular carcinoma. *J Hepatol* 2005, 42(4):511-9.
37. Wang J, Qin Y, Li B, Sun Z, Yang B: Detection of aberrant promoter methylation of GSTP1 in the tumor and serum of Chinese human primary hepatocellular carcinoma patients. *Clin Biochem* 2006, 39(4):344-8.
38. Yang WF: Detection aberrant promoter methylation of GSTP1 gene in hepatocellular carcinoma. Soochow Univ 2004.
39. Wu L, Qian YB, Zhu LX, Geng XP, Xiong QR: Promoter methylation and mRNA expression of SFRP1 and APC gene in hepatocellular carcinoma. *Chin J Gen Surg* 2008, 17(1):29-33.
40. Park WS, Cho YG, Kim CJ, Song JH, Lee YS, Kim SY, Nam SW, Lee SH, Yoo NJ, Lee JY: Hypermethylation of the RUNX3 gene in hepatocellular carcinoma. *Exp Mol Med* 2005, 37(4):276-81.
41. Zhang HY, Li K, He XB: Methylation status analysis of Runx3 gene in hepatocellular carcinoma and clinical significance. *Clinical Focus* 2009, 24(5):409-12.
42. Zhang HY, Liu J, Xie TB: Promoter hypermethylation of the Runx3 gene in hepatocellular carcinoma. *Acta Med Univ Sci Technol Huazhong* 2009, 38(1):23-6.
43. Jiang XJ, Li JG, Lin ZC: Relationship between promoter methylation and mRNA expression of RUNX3 gene in human primary hepatocellular carcinoma and its significance. *Chin J Exp Surg* 2011, 28(10):1640-2.
44. Li JG, Jiang XJ: Methylation of RUNX3 gene promoter in HCC and its significance. *J Third Mil Med Univ* 2012, 34(19):1933-5.
45. Wu FX, Chen J, Yang C, Cao J, Ou C, Zhao YG: p14ARF promoter methylation and its clinical correlation in hepatocellular carcinoma. *J Guangxi Med Univ* 2009, 26(2):218-20.
46. Zhang JX, Wang Y, Zhao YP, Zhang B, Li J, Huang J: p14ARF promoter methylation and its clinical correlation in primary liver cancer in the population of North China. *J Clin Hepatol* 2011, 27(10):1051-4.
47. Huang L, Li MX, Wang L, Li BK, Chen GH, He LR, Xu L, Yuan YF: Prognostic value of Wnt inhibitory factor-1 expression in hepatocellular carcinoma that is independent of gene methylation. *Tumour Biol* 2011, 32(1):233-40.
48. Liang H: Frequent epigenetic inactivation of Wnt inhibitory factor-1 in hepatocellular carcinoma. Sun Yatsen University 2008.
49. Ding Z, Qian YB, Xiong QR, Yu HZ, Li FY, Zhang C, Xu YC: Promoter methylation and

- mRNA expression of DKK-3 gene in hepatocellular carcinoma. *J Clin Med Pract* 2009, 13(2):12-5.
50. Tong B: Methylation of WIF-1 gene and its expression in hepatocellular carcinoma. *Tianjin Med Univ* 2010.
  51. Dou CY, Fan YC, Cao CJ, Yang Y, Wang K: Sera DNA methylation of CDH1, DNMT3b and ESR1 promoters as biomarker for the early diagnosis of hepatitis B virus-related hepatocellular carcinoma. *Dig Dis Sci* 2016, 61(4):1130-8.
  52. Huang WQ, Yang WL, Chai XJ, Chen KF, Wei L, Li B, Qin Y: Aberrant promoter CpG islands methylation of E-cadherin in human primary hepatocellular carcinomas. *Chin J Bases Clin General Surg* 2011, 18(5):514-9.
  53. Qian B, Zhu LX, Geng XP, Xiong QR, Qian YB, Li XM: Methylation of MGMT, DAPK, THBS1 and RIZ1 genes in hepatocellular carcinoma. *Chin J Gen Surg* 2005, 20(5):291-4.
  54. Liu JY, Qin Y, Sun ZL, Sun ZF: Methylation of p15 and p16 gene 5' CpG island in human primary liver cancer. *J Sichuan Univ* 2002, 39:127-32.
  55. Okochi O, Hibi K, Sakai M, Inoue S, Takeda S, Kaneko T, Nakao A: Methylation-mediated silencing of SOCS-1 gene in hepatocellular carcinoma derived from cirrhosis. *Clin Cancer Res* 2003, 9(14):5295-8.
  56. Chu PY, Yeh CM, Hsu NC, Chang YS, Chang JG, Yeh KT: Epigenetic alteration of the SOCS1 gene in hepatocellular carcinoma. *Swiss Med Wkly* 2010, 140:w13065.
  57. Saelee P, Chuensumran U, Wongkham S, Chariyalertsak S, Tiwawech D, Petmitr S: Hypermethylation of suppressor of cytokine signaling 1 in hepatocellular carcinoma patients. *Asian Pac J Cancer Prev* 2012, 13(7):3489-93.
  58. Shih YL, Shyu RY, Hsieh CB, Lai HC, Liu KY, Chu TY, Lin YW: Promoter methylation of the secreted frizzled-related protein 1 gene SFRP1 is frequent in hepatocellular carcinoma. *Cancer* 2006, 107(3):579-90.
  59. Su Q: Clinical research of the methylation status of 14-3-3 sigma gene and SFRP genes in hepatitis B virus-related hepatocellular carcinoma. *Anhui Med Univ* 2009.
  60. Yang B: CDKN2A gene methylation and its clinical study in hepatocellular carcinoma. *Nankai Univ* 2006.
  61. Zhang YJ, Wu HC, Shen J, Ahsan H, Tsai WY, Yang HI, Wang LY, Chen SY, Chen CJ, Santella RM: Predicting hepatocellular carcinoma by detection of aberrant promoter methylation in serum DNA. *Clin Cancer Res* 2007, 13(8):2378-84.
  62. Lin Q, Tang YM, Chen LB, Wang J: Analysis of promoter hypermethylation of p16 gene, AFP and CEA in sera from primary liver cancer patients. *J Dalian Med Univ* 2006, 28(4):290-2.
  63. Zhang JC, Lv J, Li HP, Feng J, Wu JM, Hu LH: p16 promoter hypermethylation in the plasma DNA and its possible application in molecular diagnosis of hepatocellular carcinoma. *Chin J Lab Med* 2006, 29(10):895-898.
  64. He QF, Yan D, Wang LX: Promoter hypermethylation of RASSF1A and p16 gene in plasma of patients with hepatocellular carcinoma. *Chin J Public Health* 2010, 26(7):819-21.
  65. Yang JJ, Dang DM, Wang MQ, Ren CJ, Hui QY: The gene methylation of p16, Runx3 in patients with hepatocellular carcinoma. *Modern Oncology* 2013, 21(05):1081-4.
  66. Qiu XQ, Chen G, Yu HP, Hu L: Detection of RASSF1A promoter hypermethylation in plasma of patients with primary hepatocellular carcinoma and its clinical significance. *World Chin J Dig* 2009, 17(1):90-93.

67. Fei BJ, Huang ZH, Hua D, Hu Y, Cheng ZH, Yu J: Clinical significance of methylation of plasma Ras-association domain family 1A gene in the molecular diagnosis of hepatocellular carcinoma. *Tumor* 2011, 31(8):742-7.
68. Gong HY, Liu ZG, Zhang HY: Detection of promoter hypermethylation of RASSF1A and CDH13 gene by nested methylation specific polymerase chain reaction in hepatocellular carcinoma patients. *Life Science Res* 2011, 15(1):56-60.
69. Zhao HJ, Li SM, Zhang HJ, Guo ZJ, Fan HY, Yang GR, Wang L, Zhang N: Diagnostic and prognostic value of RASSF1A and APC gene methylation in plasma of liver cancer patients. *Chin J Cancer Prev Treat* 2013, 20(1):53-7.



Supplementary Table 1: The basic characteristics of the included studies in the meta-analysis.

| Gene       | Author              | Year | Geographical population | Sample type      | Method | HBV-positive HCC | HBV-negative HCC |
|------------|---------------------|------|-------------------------|------------------|--------|------------------|------------------|
| <i>p16</i> | Ivy H N Wong [1]    | 1999 | Chinese                 | carcinoma tissue | MSP    | 17               | 5                |
|            | Ivy H N Wong [2]    | 2000 | Chinese                 | carcinoma tissue | MSP    | 22               | 3                |
|            | Bin Yang [3]        | 2003 | American                | carcinoma tissue | MSP    | 9                | 24               |
|            | Yang Qin [4]        | 2004 | Chinese                 | carcinoma tissue | MSP    | 13               | 7                |
|            | Xin Li [5]          | 2004 | Japanese                | carcinoma tissue | MSP    | 13               | 5                |
|            | Bin Yang [6]        | 2005 | Chinese                 | carcinoma tissue | MSP    | 14               | 5                |
|            | Fukai K [7]         | 2005 | Japanese                | carcinoma tissue | MSP    | 14               | 2                |
|            | Hiroto Katoh [8]    | 2006 | Japanese                | carcinoma tissue | MSP    | 17               | 13               |
|            | Zhang Jicai [9]     | 2006 | Chinese                 | carcinoma tissue | MSP    | 32               | 12               |
|            | Pei-Fen Su [10]     | 2007 | Chinese                 | carcinoma tissue | MSP    | 30               | 25               |
|            | S Nomoto [11]       | 2007 | Japanese                | carcinoma tissue | MSP    | 3                | 3                |
|            | Naoshi Nishida [12] | 2008 | Japanese                | carcinoma tissue | MSP    | 13               | 18               |
|            | Hang Su [13]        | 2008 | Chinese                 | carcinoma tissue | MSP    | 45               | 8                |
|            | So Kurita [14]      | 2009 | Japanese                | carcinoma tissue | MSP    | 9                | 5                |
|            | Qinghua Feng [15]   | 2010 | American                | carcinoma tissue | MSP    | 12               | 0                |
|            | YaZhen Zhu [16]     | 2010 | Chinese                 | carcinoma tissue | MSP    | 20               | 10               |
|            | Zhen Qu [17]        | 2015 | Chinese                 | carcinoma tissue | MSP    | 28               | 7                |
|            | Lou Cheng [18]      | 2008 | Chinese                 | carcinoma tissue | MSP    | 49               | 11               |
|            | Zhu Yazhen [19]     | 2010 | Chinese                 | carcinoma tissue | MSP    | 88               | 10               |
|            | Wang Fenfen [20]    | 2011 | Chinese                 | carcinoma tissue | MSP    | 71               | 15               |
|            | Qi Yunpeng [21]     | 2013 | Chinese                 | carcinoma tissue | MSP    | 71               | 15               |
|            | Li Huan [22]        | 2013 | Chinese                 | carcinoma tissue | MSP    | 28               | 7                |

|                    |      |         |                  |     |    |    |
|--------------------|------|---------|------------------|-----|----|----|
| Zhang Jicai [23]   | 2013 | Chinese | carcinoma tissue | MSP | 32 | 12 |
| Dong Xiaogang [24] | 2016 | Chinese | carcinoma tissue | MSP | 58 | 2  |

*RASSF1A*

|                     |      |           |                  |     |     |    |
|---------------------|------|-----------|------------------|-----|-----|----|
| Hiroto Katoh [8]    | 2006 | Japanese  | carcinoma tissue | MSP | 17  | 13 |
| Naoshi Nishida [12] | 2008 | Japanese  | carcinoma tissue | MSP | 13  | 18 |
| Hang Su [13]        | 2008 | Chinese   | carcinoma tissue | MSP | 45  | 8  |
| Toyoki Moribe [25]  | 2009 | Japanese  | carcinoma tissue | MSP | 3   | 3  |
| Pensri Saelee [26]  | 2010 | Thai      | carcinoma tissue | MSP | 13  | 10 |
| Ying Feng [27]      | 2012 | Chinese   | carcinoma tissue | MSP | 84  | 19 |
| Xiaoying Zhang [28] | 2013 | Chinese   | carcinoma tissue | MSP | 45  | 3  |
| Zhen Qu [17]        | 2015 | Chinese   | carcinoma tissue | MSP | 28  | 7  |
| Ying Feng [29]      | 2015 | Chinese   | carcinoma tissue | MSP | 204 | 56 |
| Oscar C [30]        | 2016 | Brazilian | carcinoma tissue | MSP | 4   | 2  |
| Zhou Xiaojun [31]   | 2007 | Chinese   | carcinoma tissue | MSP | 15  | 9  |
| Lou Cheng [18]      | 2008 | Chinese   | carcinoma tissue | MSP | 49  | 11 |
| Zhang Huijin [32]   | 2011 | Chinese   | carcinoma tissue | MSP | 81  | 13 |
| Xue Wanjiang [33]   | 2012 | Chinese   | carcinoma tissue | MSP | 65  | 15 |
| Li Huan [22]        | 2013 | Chinese   | carcinoma tissue | MSP | 28  | 7  |
| Fan Haiyan [34]     | 2013 | Chinese   | carcinoma tissue | MSP | 81  | 13 |
| Chen Tangen [35]    | 2013 | Chinese   | carcinoma tissue | MSP | 81  | 19 |
| Dong Xiaogang [24]  | 2016 | Chinese   | carcinoma tissue | MSP | 58  | 2  |

*GSTP1*

|              |      |          |                  |     |   |    |
|--------------|------|----------|------------------|-----|---|----|
| Bin Yang [3] | 2003 | American | carcinoma tissue | MSP | 9 | 24 |
|--------------|------|----------|------------------|-----|---|----|

|                     |      |          |                  |     |    |    |
|---------------------|------|----------|------------------|-----|----|----|
| Motohisa Tada [36]  | 2005 | Japanese | carcinoma tissue | MSP | 13 | 8  |
| Jinhong Wang [37]   | 2006 | Chinese  | carcinoma tissue | MSP | 20 | 6  |
| Hiroto Katoh [8]    | 2006 | Japanese | carcinoma tissue | MSP | 17 | 13 |
| Peifen Su [10]      | 2007 | Chinese  | carcinoma tissue | MSP | 30 | 25 |
| S Nomoto [11]       | 2007 | Japanese | carcinoma tissue | MSP | 3  | 3  |
| Naoshi Nishida [12] | 2008 | Japanese | carcinoma tissue | MSP | 13 | 18 |
| Toyoki Moribe [25]  | 2009 | Japanese | carcinoma tissue | MSP | 3  | 3  |
| Zhen Qu [17]        | 2015 | Chinese  | carcinoma tissue | MSP | 28 | 7  |
| Yang Weifu [38]     | 2004 | Chinese  | carcinoma tissue | MSP | 21 | 4  |
| Lou Cheng [18]      | 2008 | Chinese  | carcinoma tissue | MSP | 49 | 11 |
| Li Huan [22]        | 2013 | Chinese  | carcinoma tissue | MSP | 28 | 7  |

#### *APC*

|                     |      |          |                  |     |    |    |
|---------------------|------|----------|------------------|-----|----|----|
| Bin Yang [3]        | 2003 | American | carcinoma tissue | MSP | 9  | 24 |
| Hiroto Katoh [8]    | 2006 | Japanese | carcinoma tissue | MSP | 17 | 13 |
| S Nomoto [11]       | 2007 | Japanese | carcinoma tissue | MSP | 3  | 3  |
| Naoshi Nishida [12] | 2008 | Japanese | carcinoma tissue | MSP | 13 | 18 |
| Toyoki Moribe [25]  | 2009 | Japanese | carcinoma tissue | MSP | 3  | 3  |
| Lou Cheng [18]      | 2008 | Chinese  | carcinoma tissue | MSP | 49 | 11 |
| Wu Long [39]        | 2008 | Chinese  | carcinoma tissue | MSP | 25 | 5  |
| Wang Fenfen [20]    | 2011 | Chinese  | carcinoma tissue | MSP | 71 | 15 |
| Zhang Huijin [32]   | 2011 | Chinese  | carcinoma tissue | MSP | 81 | 13 |
| Qi Yunpeng [21]     | 2013 | Chinese  | carcinoma tissue | MSP | 71 | 15 |

#### *RUNX3*

|                    |      |        |                  |     |    |   |
|--------------------|------|--------|------------------|-----|----|---|
| Won Sang Park [40] | 2005 | Korean | carcinoma tissue | MSP | 64 | 4 |
|--------------------|------|--------|------------------|-----|----|---|

|                     |      |          |                  |     |    |    |
|---------------------|------|----------|------------------|-----|----|----|
| S Nomoto [11]       | 2007 | Japanese | carcinoma tissue | MSP | 3  | 3  |
| Naoshi Nishida [12] | 2008 | Japanese | carcinoma tissue | MSP | 13 | 18 |
| Toyoki Moribe [25]  | 2009 | Japanese | carcinoma tissue | MSP | 3  | 3  |
| Haiyuan Zhang [41]  | 2009 | Chinese  | carcinoma tissue | MSP | 58 | 10 |
| Zhang Haiyuan [42]  | 2009 | Chinese  | carcinoma tissue | MSP | 43 | 4  |
| Jiang Xiaojie [43]  | 2011 | Chinese  | carcinoma tissue | MSP | 50 | 25 |
| Li Jianguo [44]     | 2012 | Chinese  | carcinoma tissue | MSP | 58 | 37 |

*p14*

|                   |      |          |                  |     |    |    |
|-------------------|------|----------|------------------|-----|----|----|
| Bin Yang [3]      | 2003 | American | carcinoma tissue | MSP | 9  | 24 |
| Fukai K [7]       | 2005 | Japanese | carcinoma tissue | MSP | 14 | 2  |
| Peifen Su [10]    | 2007 | Chinese  | carcinoma tissue | MSP | 30 | 25 |
| Wu Feixiang [45]  | 2009 | Chinese  | carcinoma tissue | MSP | 36 | 14 |
| Zhang Junxia [46] | 2011 | Chinese  | carcinoma tissue | MSP | 70 | 16 |
| Zhang Jicai [23]  | 2013 | Chinese  | carcinoma tissue | MSP | 32 | 12 |

*WIF1*

|                   |      |         |                  |     |     |    |
|-------------------|------|---------|------------------|-----|-----|----|
| Liang Huang [47]  | 2011 | Chinese | carcinoma tissue | MSP | 94  | 11 |
| Liang Huang [48]  | 2008 | Chinese | carcinoma tissue | MSP | 101 | 12 |
| Ding Zhen [49]    | 2009 | Chinese | carcinoma tissue | MSP | 29  | 4  |
| Tong Bai [50]     | 2010 | Chinese | carcinoma tissue | MSP | 44  | 9  |
| Zhang Huijin [32] | 2011 | Chinese | carcinoma tissue | MSP | 81  | 13 |
| Fan Haiyan [34]   | 2013 | Chinese | carcinoma tissue | MSP | 81  | 13 |

*CDH1*

|              |      |          |                  |     |   |    |
|--------------|------|----------|------------------|-----|---|----|
| Bin Yang [3] | 2003 | American | carcinoma tissue | MSP | 9 | 24 |
|--------------|------|----------|------------------|-----|---|----|

|                     |      |          |                  |     |     |    |
|---------------------|------|----------|------------------|-----|-----|----|
| Hiroto Katoh [8]    | 2006 | Japanese | carcinoma tissue | MSP | 17  | 13 |
| Peifen Su [10]      | 2007 | Chinese  | carcinoma tissue | MSP | 30  | 25 |
| Naoshi Nishida [12] | 2008 | Japanese | carcinoma tissue | MSP | 13  | 18 |
| Chengyun Dou [51]   | 2015 | Chinese  | carcinoma tissue | MSP | 153 | 30 |
| Huang Wenqing [52]  | 2011 | Chinese  | carcinoma tissue | MSP | 33  | 1  |

*PRDM2*

|                     |      |          |                  |     |    |    |
|---------------------|------|----------|------------------|-----|----|----|
| S Nomoto [11]       | 2007 | Japanese | carcinoma tissue | MSP | 3  | 3  |
| Naoshi Nishida [12] | 2008 | Japanese | carcinoma tissue | MSP | 13 | 18 |
| Zhen Qu [17]        | 2015 | Chinese  | carcinoma tissue | MSP | 28 | 7  |
| Qian Bo [53]        | 2005 | Chinese  | carcinoma tissue | MSP | 35 | 5  |
| Lou Cheng [18]      | 2008 | Chinese  | carcinoma tissue | MSP | 49 | 11 |
| Li Huan [22]        | 2013 | Chinese  | carcinoma tissue | MSP | 28 | 7  |

*p15*

|                  |      |          |                  |     |    |    |
|------------------|------|----------|------------------|-----|----|----|
| Ivy H N Wong [2] | 2000 | Chinese  | carcinoma tissue | MSP | 22 | 3  |
| Bin Yang [3]     | 2003 | American | carcinoma tissue | MSP | 9  | 24 |
| Yang Qin [4]     | 2004 | Chinese  | carcinoma tissue | MSP | 13 | 7  |
| Fukai K [7]      | 2005 | Japanese | carcinoma tissue | MSP | 14 | 2  |
| Liu Jianyu [54]  | 2002 | Chinese  | carcinoma tissue | MSP | 13 | 7  |
| Zhang Jicai [23] | 2013 | Chinese  | carcinoma tissue | MSP | 32 | 12 |

*SOCS1*

|                     |      |          |                  |     |    |    |
|---------------------|------|----------|------------------|-----|----|----|
| Osamu Okochi [55]   | 2003 | Japanese | carcinoma tissue | MSP | 8  | 6  |
| S Nomoto [11]       | 2007 | Japanese | carcinoma tissue | MSP | 3  | 3  |
| Naoshi Nishida [12] | 2008 | Japanese | carcinoma tissue | MSP | 13 | 18 |

|              |                     |      |          |                  |     |    |    |
|--------------|---------------------|------|----------|------------------|-----|----|----|
|              | Peiyi Chu [56]      | 2010 | Chinese  | carcinoma tissue | MSP | 21 | 15 |
|              | Pensri Saelee [57]  | 2012 | Thai     | carcinoma tissue | MSP | 13 | 10 |
| <i>SFRP1</i> |                     |      |          |                  |     |    |    |
|              | YuLueng Shih [58]   | 2006 | Chinese  | carcinoma tissue | MSP | 33 | 11 |
|              | S Nomoto [11]       | 2007 | Japanese | carcinoma tissue | MSP | 3  | 3  |
|              | Wu Long [39]        | 2008 | Chinese  | carcinoma tissue | MSP | 25 | 5  |
|              | Su Qian [59]        | 2009 | Chinese  | carcinoma tissue | MSP | 4  | 41 |
| <i>MGMT</i>  |                     |      |          |                  |     |    |    |
|              | Peifen Su [10]      | 2007 | Chinese  | carcinoma tissue | MSP | 30 | 25 |
|              | Qian Bo [53]        | 2005 | Chinese  | carcinoma tissue | MSP | 35 | 5  |
|              | Lou Cheng [18]      | 2008 | Chinese  | carcinoma tissue | MSP | 49 | 11 |
| <i>p16</i>   |                     |      |          |                  |     |    |    |
|              | Bin Yang [6]        | 2005 | Chinese  | adjacent tissue  | MSP | 14 | 5  |
|              | Zhang Jicai [9]     | 2006 | Chinese  | adjacent tissue  | MSP | 32 | 12 |
|              | Pei-Fen Su [10]     | 2007 | Chinese  | adjacent tissue  | MSP | 30 | 25 |
|              | S Nomoto [11]       | 2007 | Japanese | adjacent tissue  | MSP | 3  | 3  |
|              | Naoshi Nishida [12] | 2008 | Japanese | adjacent tissue  | MSP | 15 | 18 |
|              | Hang Su [13]        | 2008 | Chinese  | adjacent tissue  | MSP | 45 | 8  |
|              | YaZhen Zhu [16]     | 2010 | Chinese  | adjacent tissue  | MSP | 20 | 10 |
|              | Liu Jianyu [54]     | 2002 | Chinese  | adjacent tissue  | MSP | 13 | 7  |
|              | Bin Yang [60]       | 2006 | Chinese  | adjacent tissue  | MSP | 14 | 5  |
|              | Zhu Yazhen [19]     | 2010 | Chinese  | adjacent tissue  | MSP | 88 | 10 |

*GSTP1*

|                     |      |          |                 |     |    |    |
|---------------------|------|----------|-----------------|-----|----|----|
| Motohisa Tada [36]  | 2005 | Japanese | adjacent tissue | MSP | 13 | 8  |
| Jinhong Wang [37]   | 2006 | Chinese  | adjacent tissue | MSP | 20 | 6  |
| Peifen Su [10]      | 2007 | Chinese  | adjacent tissue | MSP | 30 | 25 |
| S Nomoto [11]       | 2007 | Japanese | adjacent tissue | MSP | 3  | 3  |
| Naoshi Nishida [12] | 2008 | Japanese | adjacent tissue | MSP | 15 | 18 |
| Toyoki Moribe [25]  | 2009 | Japanese | adjacent tissue | MSP | 3  | 3  |

*RASSF1A*

|                     |      |          |                 |     |    |    |
|---------------------|------|----------|-----------------|-----|----|----|
| Naoshi Nishida [12] | 2008 | Japanese | adjacent tissue | MSP | 15 | 18 |
| Hang Su [13]        | 2008 | Chinese  | adjacent tissue | MSP | 45 | 8  |
| Toyoki Moribe [25]  | 2009 | Japanese | adjacent tissue | MSP | 3  | 3  |

*APC*

|                     |      |          |                 |     |    |    |
|---------------------|------|----------|-----------------|-----|----|----|
| S Nomoto [11]       | 2007 | Japanese | adjacent tissue | MSP | 3  | 3  |
| Naoshi Nishida [12] | 2008 | Japanese | adjacent tissue | MSP | 15 | 18 |
| Toyoki Moribe [25]  | 2009 | Japanese | adjacent tissue | MSP | 3  | 3  |

*RUNX3*

|                     |      |          |                 |     |    |    |
|---------------------|------|----------|-----------------|-----|----|----|
| S Nomoto [11]       | 2007 | Japanese | adjacent tissue | MSP | 3  | 3  |
| Naoshi Nishida [12] | 2008 | Japanese | adjacent tissue | MSP | 15 | 18 |
| Toyoki Moribe [25]  | 2009 | Japanese | adjacent tissue | MSP | 3  | 3  |

*SOCS1*

|                     |      |          |                 |     |    |    |
|---------------------|------|----------|-----------------|-----|----|----|
| S Nomoto [11]       | 2007 | Japanese | adjacent tissue | MSP | 3  | 3  |
| Naoshi Nishida [12] | 2008 | Japanese | adjacent tissue | MSP | 15 | 18 |

|              |                     |      |          |                 |     |    |    |
|--------------|---------------------|------|----------|-----------------|-----|----|----|
|              | Peiyi Chu [56]      | 2010 | Chinese  | adjacent tissue | MSP | 21 | 15 |
| <i>CDH1</i>  | Peifen Su [10]      | 2007 | Chinese  | adjacent tissue | MSP | 30 | 25 |
|              | Naoshi Nishida [12] | 2008 | Japanese | adjacent tissue | MSP | 15 | 18 |
|              | Huang Wenqing [52]  | 2011 | Chinese  | adjacent tissue | MSP | 33 | 1  |
| <i>SFRP1</i> | YuLueng Shih [58]   | 2006 | Chinese  | adjacent tissue | MSP | 33 | 11 |
|              | S Nomoto [11]       | 2007 | Japanese | adjacent tissue | MSP | 3  | 3  |
|              | Su Qian [59]        | 2009 | Chinese  | adjacent tissue | MSP | 4  | 41 |
| <i>p16</i>   | Ivy H N Wong [1]    | 1999 | Chinese  | carcinoma serum | MSP | 17 | 5  |
|              | Ivy H N Wong [2]    | 2000 | Chinese  | carcinoma serum | MSP | 22 | 3  |
|              | Yujing Zhang [61]   | 2007 | Chinese  | carcinoma serum | MSP | 25 | 14 |
|              | Lin Qing [62]       | 2006 | Chinese  | carcinoma serum | MSP | 36 | 28 |
|              | Zhang Jicai [63]    | 2006 | Chinese  | carcinoma serum | MSP | 32 | 12 |
|              | He Qingfang [64]    | 2010 | Chinese  | carcinoma serum | MSP | 83 | 17 |
|              | Wang Fenfen [20]    | 2011 | Chinese  | carcinoma serum | MSP | 71 | 15 |
|              | Qi Yunpeng [21]     | 2013 | Chinese  | carcinoma serum | MSP | 71 | 15 |
|              | Yang Jianjun [65]   | 2013 | Chinese  | carcinoma serum | MSP | 45 | 11 |
|              | Dong Xiaogang [24]  | 2016 | Chinese  | carcinoma serum | MSP | 58 | 2  |



### *RASSF1A*

|                    |      |         |                 |     |    |    |
|--------------------|------|---------|-----------------|-----|----|----|
| Yujing Zhang [61]  | 2007 | Chinese | carcinoma serum | MSP | 25 | 14 |
| Xiaoqiang Qiu [66] | 2009 | Chinese | carcinoma serum | MSP | 30 | 5  |
| He Qingfang [64]   | 2010 | Chinese | carcinoma serum | MSP | 83 | 17 |
| Fei Bojian [67]    | 2011 | Chinese | carcinoma serum | MSP | 61 | 11 |
| Gong huanyu [68]   | 2011 | Chinese | carcinoma serum | MSP | 28 | 4  |
| Zhao Huijin [69]   | 2013 | Chinese | carcinoma serum | MSP | 86 | 16 |
| Dong Xiaogang [24] | 2016 | Chinese | carcinoma serum | MSP | 58 | 2  |

### *APC*

|                  |      |         |                 |     |    |    |
|------------------|------|---------|-----------------|-----|----|----|
| Wang Fenfen [20] | 2011 | Chinese | carcinoma serum | MSP | 71 | 15 |
| Qi Yunpeng [21]  | 2013 | Chinese | carcinoma serum | MSP | 71 | 15 |
| Zhao Huijin [69] | 2013 | Chinese | carcinoma serum | MSP | 86 | 16 |

---

### **Abbreviation**

MSP: Methylation Specific PCR.

### **References**

1. Wong IH, Lo YM, Zhang J, Liew CT, Ng MH, Wong N, Lai PB, Lau WY, Hjelm NM, Johnson PJ: Detection of aberrant p16 methylation in the plasma and serum of liver cancer patients. *Cancer Res* 1999, 59(1):71-3.
2. Wong IH, Lo YM, Yeo W, Lau WY, Johnson PJ: Frequent p15 promoter methylation in tumor and peripheral blood from hepatocellular carcinoma patients. *Clin Cancer Res* 2000, 6(9):3516-21.
3. Yang B, Guo M, Herman JG, Clark DP: Aberrant promoter methylation profiles of tumor suppressor genes in hepatocellular carcinoma. *Am J Pathol* 2003, 163(3):1101-7.
4. Qin Y, Liu JY, Li B, Sun ZL, Sun ZF: Association of low p16INK4a and p15INK4b mRNAs expression with their CpG islands methylation with human

hepatocellular carcinogenesis. *World J Gastroenterol* 2004, 10(9):1276-80.

5. Li X, Hui AM, Sun L, Hasegawa K, Torzilli G, Minagawa M, Takayama T, Makuuchi M: p16INK4A hypermethylation is associated with hepatitis virus infection, age, and gender in hepatocellular carcinoma. *Clin Cancer Res* 2004, 10(22):7484-9.
6. Yang B, Gao YT, Du Z, Zhao L, Song WQ: Methylation-based molecular margin analysis in hepatocellular carcinoma. *Biochem Biophys Res Commun* 2005, 338(3):1353-8.
7. Fukai K, Yokosuka O, Imazeki F, Tada M, Mikata R, Miyazaki M, Ochiai T, Saisho H: Methylation status of p14ARF, p15INK4b, and p16INK4a genes in human hepatocellular carcinoma. *Liver Int* 2005, 25(6):1209-16.
8. Katoh H, Shibata T, Kokubu A, Ojima H, Fukayama M, Kanai Y, Hirohashi S: Epigenetic instability and chromosomal instability in hepatocellular carcinoma. *Am J Pathol* 2006, 168(4):1375-84.
9. Jicai Z, Zongtao Y, Jun L, Haiping L, Jianmin W, Lihua H: Persistent infection of hepatitis B virus is involved in high rate of p16 methylation in hepatocellular carcinoma. *Mol Carcinog* 2006, 45(7):530-6.
10. Su PF, Lee TC, Lin PJ, Lee PH, Jeng YM, Chen CH, Liang JD, Chiou LL, Huang GT, Lee HS: Differential DNA methylation associated with hepatitis B virus infection in hepatocellular carcinoma. *Int J Cancer* 2007, 121(6):1257-64.
11. Nomoto S, Kinoshita T, Kato K, Otani S, Kasuya H, Takeda S, Kanazumi N, Sugimoto H, Nakao A: Hypermethylation of multiple genes as clonal markers in multicentric hepatocellular carcinoma. *Br J Cancer* 2007, 97(9):1260-5.
12. Nishida N, Nagasaka T, Nishimura T, Ikai I, Boland CR, Goel A: Aberrant methylation of multiple tumor suppressor genes in aging liver, chronic hepatitis, and hepatocellular carcinoma. *Hepatology* 2008, 47(3):908-18.
13. Su H, Zhao J, Xiong Y, Xu T, Zhou F, Yuan Y, Zhang Y, Zhuang SM: Large-scale analysis of the genetic and epigenetic alterations in hepatocellular carcinoma from Southeast China. *Mutat Res* 2008, 641(1-2):27-35.
14. Kurita S, Ohkoshi S, Yano M, Yamazaki K, Suzuki K, Aoki YH, Matsuda Y, Wakai T, Shirai Y, Ichida T, Aoyagi Y: Progression of hypermethylation of the p16(INK4A) gene from normal liver to nontumorous liver and hepatocellular carcinoma: an evaluation using quantitative PCR analysis. *Dig Dis Sci* 2009, 54(1):80-8.
15. Feng Q, Stern JE, Hawes SE, Lu H, Jiang M, Kiviat NB: DNA methylation changes in normal liver tissues and hepatocellular carcinoma with different viral infection. *Exp Mol Pathol* 2010, 88(2):287-92.
16. Zhu YZ, Zhu R, Shi LG, Mao Y, Zheng GJ, Chen Q, Zhu HG: Hepatitis B virus X protein promotes hypermethylation of p16(INK4A) promoter through upregulation of DNA methyltransferases in hepatocarcinogenesis. *Exp Mol Pathol* 2010, 89(3):268-75.

17. Qu Z, Jiang Y, Li H, Yu DC, Ding YT: Detecting abnormal methylation of tumor suppressor genes GSTP1, P16, RIZ1, and RASSF1A in hepatocellular carcinoma and its clinical significance. *Oncol Lett* 2015, 10(4):2553-2558.
18. Lou C: The experimental research on DNA methylation profile in hepatocellular carcinoma. *Tianjin Med Univ* 2008.
19. Zhu YZ: Research on Hepatitis B Virus X Protein promoting hypermethylation of p16INK4A promoter. *Fudan Univ* 2010.
20. Wang FF: Correlation of aberrant methylation of p16, APC gene to MTHFR, TS genetic polymorphisms in hepatic carcinoma. *Qingdao Univ* 2011.
21. Qi YP, Wang FF, Cui LH, Song Y: Detection of methylation of p16 and APC gene in liver-cancer tissue and plasma and its clinical significance. *Med J Qilu* 2013, 28(3):189-91.
22. Li H: Study of aberrant methylation and clinical significance of suppressor gene in hepatocellular carcinoma. *Soochow Univ* 2013.
23. Zhang JC, Yu ZT, Lv J, Xie F, Gao B, Li HP: The relationship between Hepatitis B Virus infection and Multigene methylation in hepatocellular carcinoma. *J Clin Intern Med* 2013, 30(3):163-5.
24. Dong XG, Guo WJ, Ding W: Detection of methylation of p16 and RASSF1A gene in plasma and tumor tissues from patients with hepatocellular carcinoma and its clinical significance. *Chin Med Biotechnol* 2016, 11(3):252-258.
25. Moribe T, Iizuka N, Miura T, Kimura N, Tamatsukuri S, Ishitsuka H, Hamamoto Y, Sakamoto K, Tamesa T, Oka M: Methylation of multiple genes as molecular markers for diagnosis of a small, well-differentiated hepatocellular carcinoma. *Int J Cancer* 2009, 125(2):388-97.
26. Saelee P, Wongkham S, Chariyalertsak S, Petmitr S, Chuensumran U: RASSF1A promoter hypermethylation as a prognostic marker for hepatocellular carcinoma. *Asian Pac J Cancer Prev* 2010, 11(6):1677-81.
27. Feng Y, Xue WJ, Li P, Sha ZY, Huang H, Rui L, Li HX, Mao QS: RASSF1A hypermethylation is associated with aflatoxin B1 and polycyclic aromatic hydrocarbon exposure in hepatocellular carcinoma. *Hepatogastroenterology* 2012, 59(118):1883-8.
28. Zhang X, Li HM, Liu Z, Zhou G, Zhang Q, Zhang T, Zhang J, Zhang C: Loss of heterozygosity and methylation of multiple tumor suppressor genes on chromosome 3 in hepatocellular carcinoma. *J Gastroenterol* 2013, 48(1):132-43.
29. Feng Y, Li P, Liu Y, Sha Z, Feng L, Wang F, Mao Q, Xue W: The Association of Ala133Ser Polymorphism and Methylation in Ras Association Domain Family 1A Gene With Unfavorable Prognosis of Hepatocellular Carcinoma. *Hepat Mon* 2015, 15(10):e32145.
30. Araújo OC, Rosa AS, Fernandes A, Niel C, Villela-Nogueira CA, Pannain V, Araujo NM: RASSF1A and DOK1 Promoter Methylation Levels in Hepatocellular Carcinoma, Cirrhotic and Non-Cirrhotic Liver, and Correlation with Liver Cancer in Brazilian Patients. *PLoS One* 2016, 11(4): e0153796.
31. Zhou XJ, Qin L, Xue WJ, Liu JX, Tian LP, Qian HX: Inactivation of RASSF1A gene in hepatocellular carcinoma. *Chin J Hepatobiliary Surg* 2007, 13(5):351-2.
32. Zhang HJ: Prognostic significance of RASSF1A, APC, WIF-1 methylation in paraffin embedded tissues of HCC. *Hebei Univ* 2011.

33. Xue WJ, Feng Y, Li P, Mao QS, Guan HG, Qian HX: Correlation analysis of ras association domain family IA gene methylation and environmental factors to hepatocellular carcinoma. *Chin J Exp Surg* 2012, 29(4):650-2.
34. Fan HY, Zhang HJ, Guo ZJ, Li SM: Prognostic significance of RASSF1 A and WIF-1 methylation in the cancer tissues of patients with HCC. *J Shandong Univ* 2013, 51(5):89-93.
35. Chen TG, Li JG, Lin ZC: Promoter methylation of RASSF1A gene in hepatocellular carcinoma and its clinical significance. *Chin J Gen Surg* 2013, 28(4):300-3.
36. Tada M, Yokosuka O, Fukai K, Chiba T, Imazeki F, Tokuhisa T, Saisho H: Hypermethylation of NAD(P)H: quinone oxidoreductase 1 (NQO1) gene in human hepatocellular carcinoma. *J Hepatol* 2005, 42(4):511-9.
37. Wang J, Qin Y, Li B, Sun Z, Yang B: Detection of aberrant promoter methylation of GSTP1 in the tumor and serum of Chinese human primary hepatocellular carcinoma patients. *Clin Biochem* 2006, 39(4):344-8.
38. Yang WF: Detection aberrant promoter methylation of GSTP1 gene in hepatocellular carcinoma. *Soochow Univ* 2004.
39. Wu L, Qian YB, Zhu LX, Geng XP, Xiong QR: Promoter methylation and mRNA expression of SFRP1 and APC gene in hepatocellular carcinoma. *Chin J Gen Surg* 2008, 17(1):29-33.
40. Park WS, Cho YG, Kim CJ, Song JH, Lee YS, Kim SY, Nam SW, Lee SH, Yoo NJ, Lee JY: Hypermethylation of the RUNX3 gene in hepatocellular carcinoma. *Exp Mol Med* 2005, 37(4):276-81.
41. Zhang HY, Li K, He XB: Methylation status analysis of Runx3 gene in hepatocellular carcinoma and clinical significance. *Clinical Focus* 2009, 24(5):409-12.
42. Zhang HY, Liu J, Xie TB: Promoter hypermethylation of the Runx3 gene in hepatocellular carcinoma. *Acta Med Univ Sci Technol Huazhong* 2009, 38(1):23-6.
43. Jiang XJ, Li JG, Lin ZC: Relationship between promoter methylation and mRNA expression of RUNX3 gene in human primary hepatocellular carcinoma and its significance. *Chin J Exp Surg* 2011, 28(10):1640-2.
44. Li JG, Jiang XJ: Methylation of RUNX3 gene promoter in HCC and its significance. *J Third Mil Med Univ* 2012, 34(19):1933-5.
45. Wu FX, Chen J, Yang C, Cao J, Ou C, Zhao YG: p14ARF promoter methylation and its clinical correlation in hepatocellular carcinoma. *J Guangxi Med Univ* 2009, 26(2):218-20.
46. Zhang JX, Wang Y, Zhao YP, Zhang B, Li J, Huang J: p14ARF promoter methylation and its clinical correlation in primary liver cancer in the population of North China. *J Clin Hepatol* 2011, 27(10):1051-4.
47. Huang L, Li MX, Wang L, Li BK, Chen GH, He LR, Xu L, Yuan YF: Prognostic value of Wnt inhibitory factor-1 expression in hepatocellular carcinoma that is independent of gene methylation. *Tumour Biol* 2011, 32(1):233-40.
48. Liang H: Frequent epigenetic inactivation of Wnt inhibitory factor-1 in hepatocellular carcinoma. *Sun Yatsen University* 2008.

49. Ding Z, Qian YB, Xiong QR, Yu HZ, Li FY, Zhang C, Xu YC: Promoter methylation and mRNA expression of DKK-3 gene in hepatocellular carcinoma. *J Clin Med Pract* 2009, 13(2):12-5.
50. Tong B: Methylation of WIF-1 gene and its expression in hepatocellular carcinoma. *Tianjin Med Univ* 2010.
51. Dou CY, Fan YC, Cao CJ, Yang Y, Wang K: Sera DNA methylation of CDH1, DNMT3b and ESR1 promoters as biomarker for the early diagnosis of hepatitis B virus-related hepatocellular carcinoma. *Dig Dis Sci* 2016, 61(4):1130-8.
52. Huang WQ, Yang WL, Chai XJ, Chen KF, Wei L, Li B, Qin Y: Aberrant promoter CpG islands methylation of E-cadherin in human primary hepatocellular carcinomas. *Chin J Bases Clin General Surg* 2011, 18(5):514-9.
53. Qian B, Zhu LX, Geng XP, Xiong QR, Qian YB, Li XM: Methylation of MGMT, DAPK, THBS1 and RIZ1 genes in hepatocellular carcinoma. *Chin J Gen Surg* 2005, 20(5):291-4.
54. Liu JY, Qin Y, Sun ZL, Sun ZF: Methylation of p15 and p16 gene 5' CpG island in human primary liver cancer. *J Sichuan Univ* 2002, 39:127-32.
55. Okochi O, Hibi K, Sakai M, Inoue S, Takeda S, Kaneko T, Nakao A: Methylation-mediated silencing of SOCS-1 gene in hepatocellular carcinoma derived from cirrhosis. *Clin Cancer Res* 2003, 9(14):5295-8.
56. Chu PY, Yeh CM, Hsu NC, Chang YS, Chang JG, Yeh KT: Epigenetic alteration of the SOCS1 gene in hepatocellular carcinoma. *Swiss Med Wkly* 2010, 140:w13065.
57. Saelee P, Chuensumran U, Wongkham S, Chariyalertsak S, Tiwawech D, Petmitr S: Hypermethylation of suppressor of cytokine signaling 1 in hepatocellular carcinoma patients. *Asian Pac J Cancer Prev* 2012, 13(7):3489-93.
58. Shih YL, Shyu RY, Hsieh CB, Lai HC, Liu KY, Chu TY, Lin YW: Promoter methylation of the secreted frizzled-related protein 1 gene SFRP1 is frequent in hepatocellular carcinoma. *Cancer* 2006, 107(3):579-90.
59. Su Q: Clinical research of the methylation status of 14-3-3 sigma gene and SFRP genes in hepatitis B virus-related hepatocellular carcinoma. *Anhui Med Univ* 2009.
60. Yang B: CDKN2A gene methylation and its clinical study in hepatocellular carcinoma. *Nankai Univ* 2006.
61. Zhang YJ, Wu HC, Shen J, Ahsan H, Tsai WY, Yang HI, Wang LY, Chen SY, Chen CJ, Santella RM: Predicting hepatocellular carcinoma by detection of aberrant promoter methylation in serum DNA. *Clin Cancer Res* 2007, 13(8):2378-84.
62. Lin Q, Tang YM, Chen LB, Wang J: Analysis of promoter hypermethylation of p16 gene, AFP and CEA in sera from primary liver cancer patients. *J Dalian Med Univ* 2006, 28(4):290-2.
63. Zhang JC, Lv J, Li HP, Feng J, Wu JM, Hu LH: p16 promoter hypermethylation in the plasma DNA and its possible application in molecular diagnosis of

hepatocellular carcinoma. *Chin J Lab Med* 2006, 29(10):895-898.

64. He QF, Yan D, Wang LX: Promoter hypermethylation of RASSF1A and p16 gene in plasma of patients with hepatocellular carcinoma. *Chin J Public Health* 2010, 26(7):819-21.
65. Yang JJ, Dang DM, Wang MQ, Ren CJ, Hui QY: The gene methylation of p16, Runx3 in patients with hepatocellular carcinoma. *Modern Oncology* 2013, 21(05):1081-4.
66. Qiu XQ, Chen G, Yu HP, Hu L: Detection of RASSF1A promoter hypermethylation in plasma of patients with primary hepatocellular carcinoma and its clinical significance. *World Chin J Dig* 2009, 17(1):90-93.
67. Fei BJ, Huang ZH, Hua D, Hu Y, Cheng ZH, Yu J: Clinical significance of methylation of plasma Ras-association domain family 1A gene in the molecular diagnosis of hepatocellular carcinoma. *Tumor* 2011, 31(8):742-7.
68. Gong HY, Liu ZG, Zhang HY: Detection of promoter hypermethylation of RASSF1A and CDH13 gene by nested methylation specific polymerase chain reaction in hepatocellular carcinoma patients. *Life Science Res* 2011, 15(1):56-60.
69. Zhao HJ, Li SM, Zhang HJ, Guo ZJ, Fan HY, Yang GR, Wang L, Zhang N: Diagnostic and prognostic value of RASSF1A and APC gene methylation in plasma of liver cancer patients. *Chin J Cancer Prev Treat* 2013, 20(1):53-7.

Supplementary Table 2: Analysis of heterogeneity sources of 13 genes methylation between HBV-positive carcinoma tissues and HBV-negative carcinoma tissues in HCC in geographical populations.

| Gene           | Geographical population | Studies (n) | Coefficient | 95% CI                 | P value |
|----------------|-------------------------|-------------|-------------|------------------------|---------|
| <i>p16</i>     | China                   | 16          | -0.8607089  | [-2.240385, 0.5189674] | 0.209   |
|                | Japan                   | 6           | —           | —                      | —       |
|                | America                 | 2           | -1.270956   | [-4.303588, 1.761675]  | 0.394   |
| <i>RASSF1A</i> | China                   | 13          | -1.610805   | [-6.113554, 2.891943]  | 0.451   |
|                | Japan                   | 3           | -1.114868   | [-5.950196, 3.72046]   | 0.625   |
|                | Thailand                | 1           | -1.860752   | [-7.469659, 3.748155]  | 0.484   |
|                | Brazil                  | 1           | —           | —                      | —       |
| <i>GSTP1</i>   | China                   | 6           | -0.3695204  | [-2.302005, 1.562964]  | 0.676   |
|                | Japan                   | 5           | -1.061634   | [-3.170589, 1.047322]  | 0.284   |
|                | America                 | 1           | —           | —                      | —       |
| <i>APC</i>     | China                   | 5           | -0.1584815  | [-1.788317, 1.471354]  | 0.825   |
|                | Japan                   | 4           | —           | —                      | —       |
|                | America                 | 1           | -0.4311435  | [-2.806241, 1.943954]  | 0.681   |
| <i>RUNX3</i>   | China                   | 4           | 0.0165502   | [-1.765576, 1.798677]  | 0.982   |
|                | Japan                   | 3           | —           | —                      | —       |
|                | Korea                   | 1           | -0.5228616  | [-3.968048, 2.922325]  | 0.713   |
| <i>p14</i>     | China                   | 4           | —           | —                      | —       |
|                | Japan                   | 1           | —           | —                      | —       |
|                | America                 | 1           | 1.455163    | [-4.659908, 7.570233]  | 0.504   |
| <i>WIF1</i>    | China                   | 6           | —           | —                      | —       |
| <i>CDH1</i>    | China                   | 3           | -0.4265984  | [-3.87634, 3.023143]   | 0.72    |
|                | Japan                   | 2           | —           | —                      | —       |
|                | America                 | 1           | -1.406721   | [-6.14395, 3.330509]   | 0.414   |
| <i>PRDM2</i>   | China                   | 4           | 0.6768346   | [-2.008149, 3.361818]  | 0.523   |
|                | Japan                   | 2           | —           | —                      | —       |
| <i>p15</i>     | China                   | 4           | -0.4680645  | [-6.066942, 5.130813]  | 0.807   |
|                | Japan                   | 1           | —           | —                      | —       |
|                | America                 | 1           | -0.901902   | [-6.943279, 5.139475]  | 0.667   |
| <i>SOCS1</i>   | Japan                   | 3           | 1.372043    | [-4.381798, 7.125883]  | 0.413   |
|                | China                   | 1           | 1.450589    | [-4.895154, 7.796331]  | 0.429   |
|                | Thailand                | 1           | —           | —                      | —       |
| <i>SFRP1</i>   | China                   | 3           | 1.49404     | [-6.79241, 9.780489]   | 0.519   |
|                | Japan                   | 1           | —           | —                      | —       |
| <i>MGMT</i>    | China                   | 3           | —           | —                      | —       |

Analysis of heterogeneity sources of *p16* in Japan, *RASSF1A* in Brazil, *GSTP1* in

America, *APC* in Japan, *RUNX3* in Japan, *p14* in China and Japan, *WIF1* in China, *CDH1* in Japan, *PRDM2* in Japan, *p15* in Japan, *SOCS1* in Thailand, *SFRP1* in Japan and *MGMT* in China was not applicable, because the data of these genes methylation were insufficient.



Supplementary Table 3: Analysis of heterogeneity sources of eight genes methylation between HBV-positive adjacent tissues and HBV-negative adjacent tissues in HCC in geographical populations.

| Gene           | Geographical population | Studies (n) | Coefficient | 95% CI                | P value |
|----------------|-------------------------|-------------|-------------|-----------------------|---------|
| <i>p16</i>     | China                   | 8           | —           | —                     | —       |
|                | Japan                   | 2           | 1.343732    | [-1.666668, 4.354132] | 0.326   |
| <i>GSTP1</i>   | Japan                   | 4           | 1.025441    | [-3.056455, 5.107338] | 0.393   |
|                | China                   | 2           | —           | —                     | —       |
| <i>RASSF1A</i> | Japan                   | 2           | —           | —                     | —       |
|                | China                   | 1           | —           | —                     | —       |
| <i>APC</i>     | Japan                   | 3           | —           | —                     | —       |
| <i>RUNX3</i>   | Japan                   | 3           | —           | —                     | —       |
| <i>SOCS1</i>   | Japan                   | 2           | —           | —                     | —       |
|                | China                   | 1           | —           | —                     | —       |
| <i>CDH1</i>    | China                   | 2           | —           | —                     | —       |
|                | Japan                   | 1           | —           | —                     | —       |
| <i>SFRP1</i>   | China                   | 2           | —           | —                     | —       |
|                | Japan                   | 1           | —           | —                     | —       |

Analysis of heterogeneity sources of *p16* in China, *GSTP1* in China, *RASSF1A* in Japan and China, *APC* in Japan, *RUNX3* in Japan, *SOCS1* in Japan and China, *CDH1* in China and Japan, and *SFRP1* in China and Japan was not applicable, because the data of these genes methylation were insufficient.

Supplementary Table 4: Analysis of heterogeneity sources of three genes methylation between HBV-positive carcinoma serums and HBV-negative carcinoma serums in HCC in geographical populations.

| Gene           | Geographical population | Studies (n) | Coefficient | 95% CI | P value |
|----------------|-------------------------|-------------|-------------|--------|---------|
| <i>p16</i>     | China                   | 10          | —           | —      | —       |
| <i>RASSF1A</i> | China                   | 7           | —           | —      | —       |
| <i>APC</i>     | China                   | 3           | —           | —      | —       |

Analysis of heterogeneity sources of *p16* in China, *RASSF1A* in China and *APC* in China was not applicable, because the data of these genes methylation were insufficient.

Supplementary Figure 1: Forest plots of *APC* and *RUNX3* methylation between HBV-positive carcinoma tissues and HBV-negative carcinoma tissues in HCC in the meta-analysis.

## APC

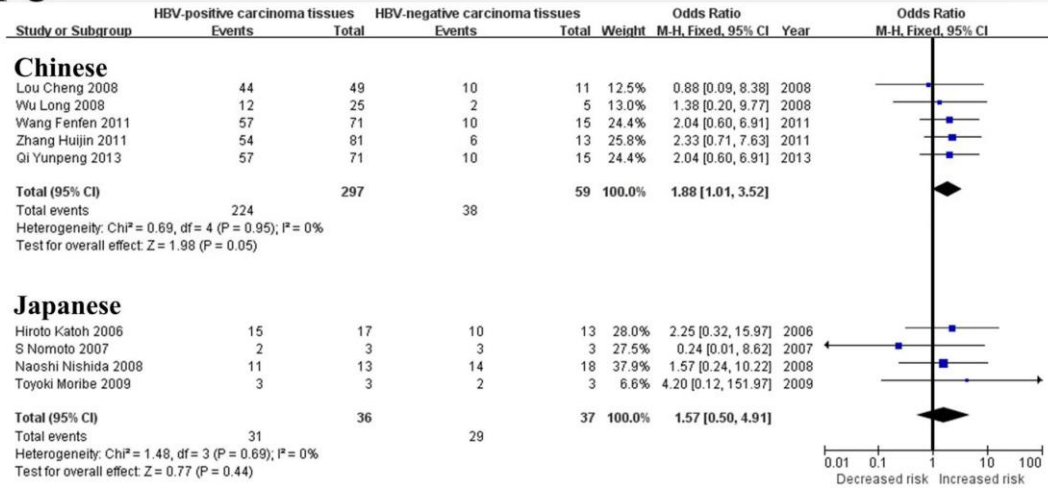

## RUNX3

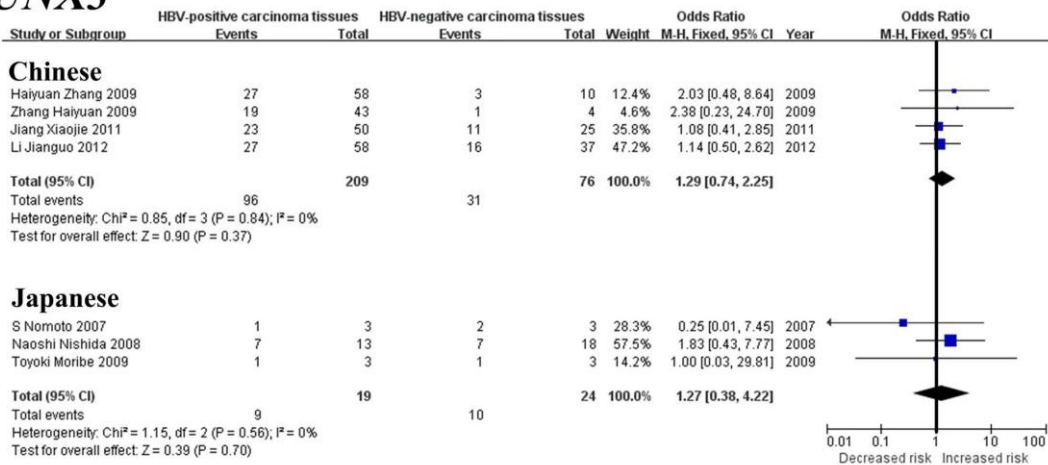

Supplement: jcav10p6457s1.pdf [file jcav10p6457s1.pdf]
